# Supplementary material
Source: publisher figshare collection journal article supplement (https://diabetesjournals.figshare.com/ndownloader/files/35504618)

**Animation 1. Functional line fit showing the evolution of 24-hr mean CGM glucose profiles across gestation in women with type 1 diabetes. Mean glucose (mmol/L) and 95% confidence interval by gestational age in weeks. The dotted horizontal line represents 7.8 mmol/L (140mg/dL) upper limit of recommended pregnancy target range.**


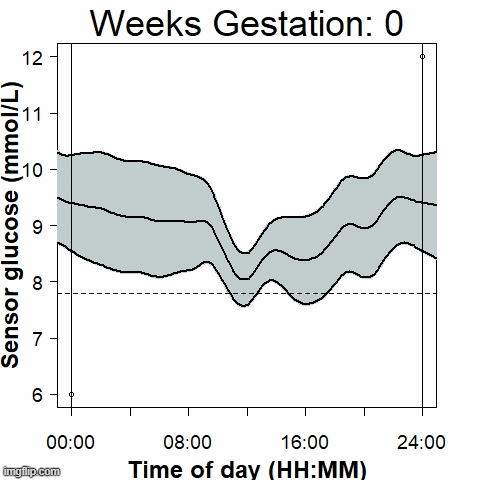

Supplement: Supplementary file 1 [file 35504618]
